# Supplementary material for: The negative adipogenesis regulator Dlk1 is transcriptionally regulated by Ifrd1 (TIS7) and translationally by its orthologue Ifrd2 (SKMc15)
Source: eLife journal article supplement (doi:10.7554/elife.88350), 2023-08-21
Supplement: fig1-figsupp1-data1 [file elife-88350-fig1-figsupp1-data1-v2.pdf]

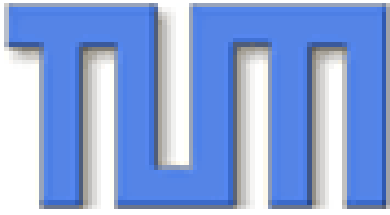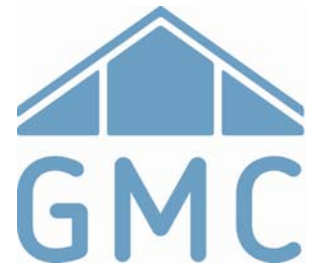

# Energy Metabolism

Jan Rozman

Ann-Elisabeth Schwarz

Anna Dewert, Brigitte Herrmann

Martin Klingenspor *Technische Universität München*

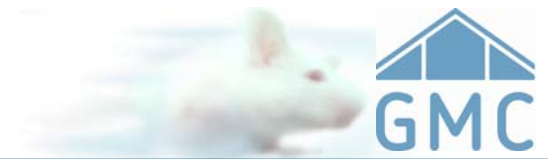

We conducted a 21 hours indirect calorimetry trial monitoring gas exchange (oxygen consumption and carbon dioxide production), activity (distance and rearing), and food intake.

We measured body mass before and after the trial and determined rectal body temperature (around 10 am before transfer of mice back to their home cages). Body composition was determined by q NMR (MiniSpec).

In a first step for statistical analysis genotype effects were tested using 1 way ANOVA.

Food intake and energy expenditure were analysed using a linear model including body mass as a co-variate. There same approach was used to analyse shifts in body composition.

# Indirect calorimetry – results overview

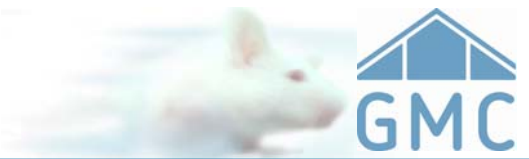

| Parameter                                       | Male          |               | ANOVA (genotype)<br>*LM (body mass as co-variate) |           |
|-------------------------------------------------|---------------|---------------|---------------------------------------------------|-----------|
|                                                 | Control       | Mutant        | Genotype                                          | body mass |
|                                                 | n= 6          | n= 7          |                                                   |           |
|                                                 | mean ± sd     | mean ± sd     | p-value                                           | p-value   |
| <b>Body mass (g)</b>                            | 31.1 ± 2.6    | 20.4 ± 1.9    | < 0.0001                                          | n/a       |
| <b>Body temperature (°C)</b>                    | 36.56 ± 0.6   | 36.71 ± 0.5   | 0.6515                                            | n/a       |
| <b>*Food intake (g)</b>                         | 4.0 ± 0.4     | 3.4 ± 0.5     | 0.5869                                            | 0.1277    |
| <b>*Mean VO<sub>2</sub> (ml h<sup>-1</sup>)</b> | 107.28 ± 8.41 | 81.12 ± 5.69  | 0.6441                                            | 0.0241    |
| <b>*Min VO<sub>2</sub> (ml h<sup>-1</sup>)</b>  | 78.83 ± 8.26  | 57.71 ± 8.86  | 0.9047                                            | 0.1219    |
| <b>*Max VO<sub>2</sub> (ml h<sup>-1</sup>)</b>  | 144.33 ± 6.98 | 107.29 ± 7.59 | 0.1944                                            | 0.0082    |
| <b>Mean RER</b>                                 | 0.89 ± 0.01   | 0.90 ± 0.02   | 0.3754                                            | n/a       |
| <b>Mean DistD (cm 20 min<sup>-1</sup>)</b>      | 928 ± 173     | 874 ± 219     | 0.6399                                            | n/a       |
| <b>Mean Z (rearing 20min<sup>-1</sup>)</b>      | 116 ± 34      | 96 ± 25       | 0.2444                                            | n/a       |

# Figures – general results

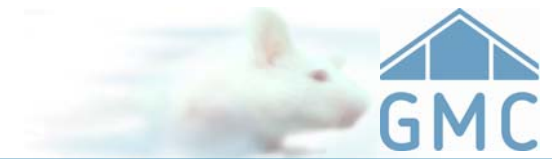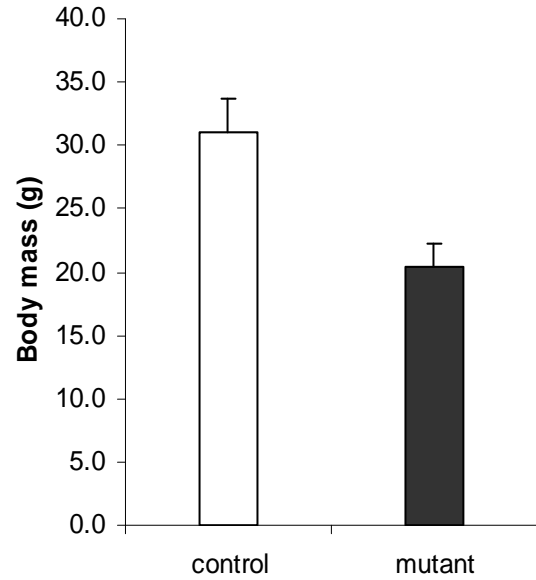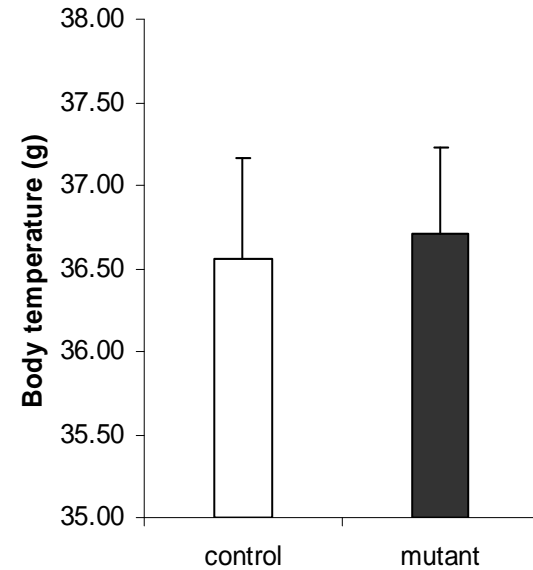

## Body composition (qNMR)\*

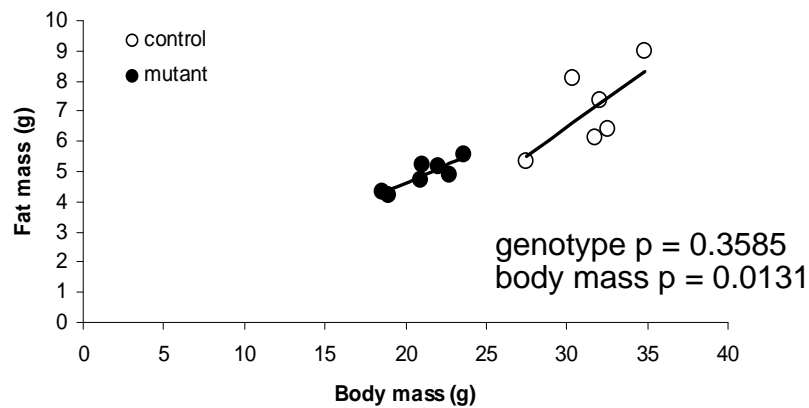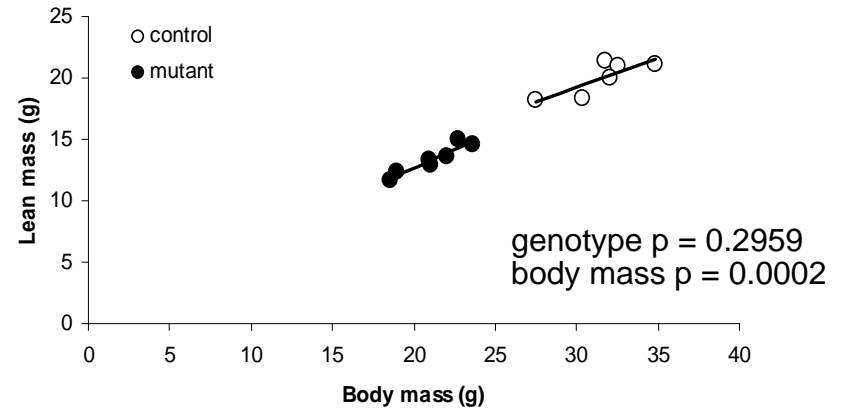

\*statistics: linear regression model including body mass as co-variate

# Indirect Calorimetry: VO<sub>2</sub> over time

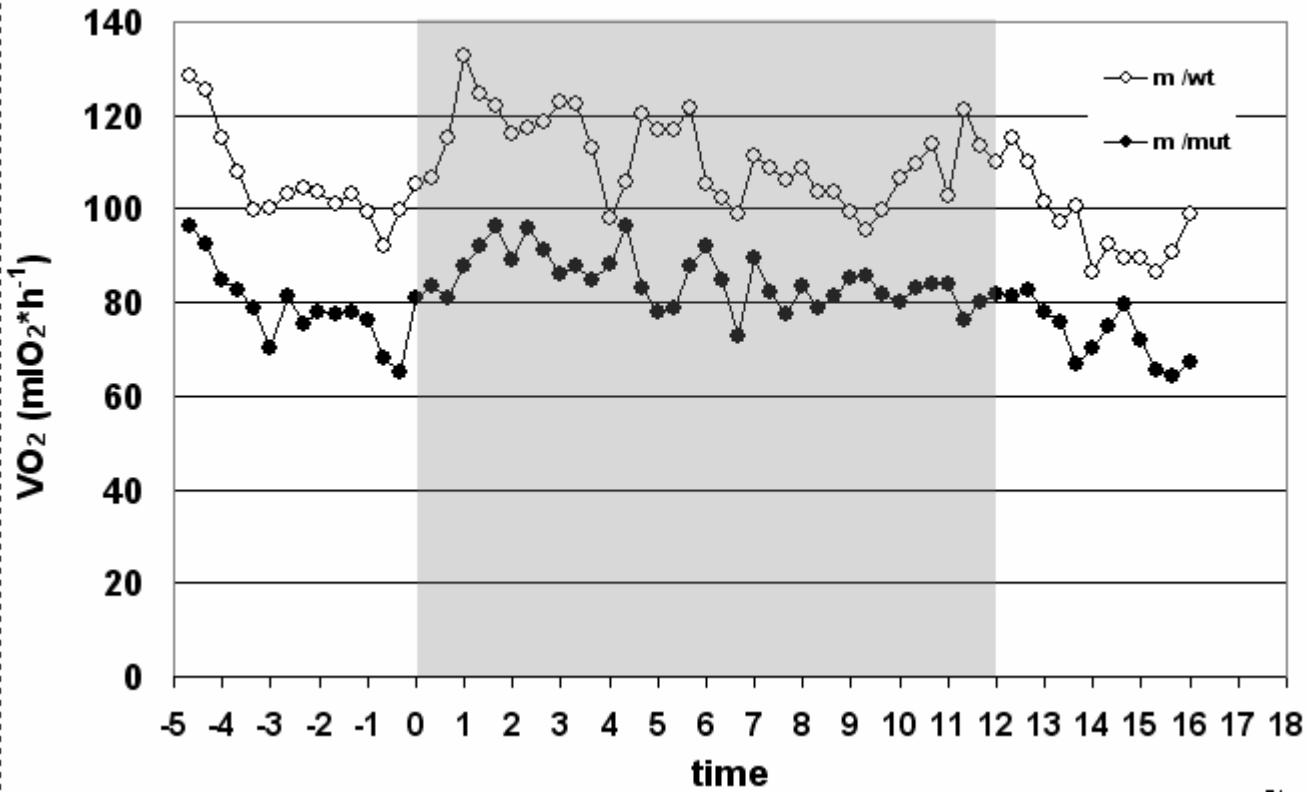

# Energy expenditure and food consumption

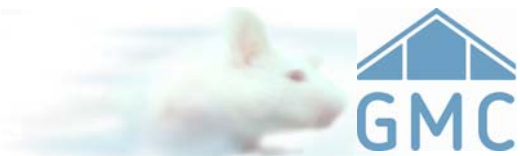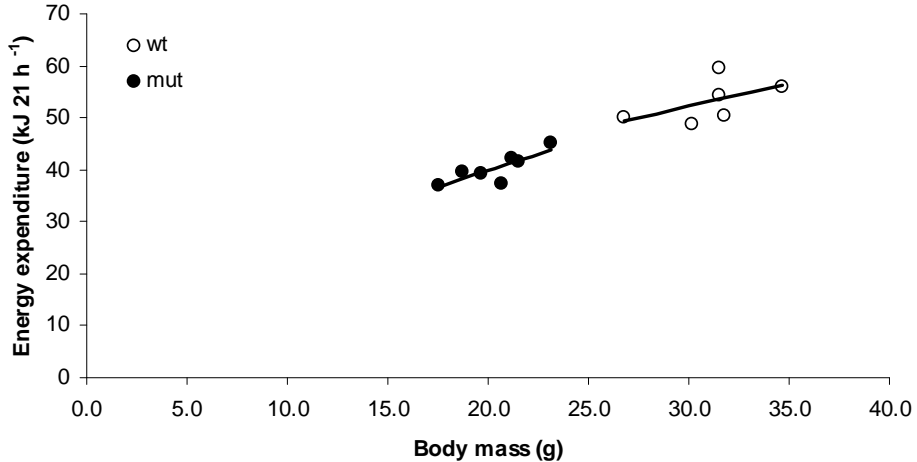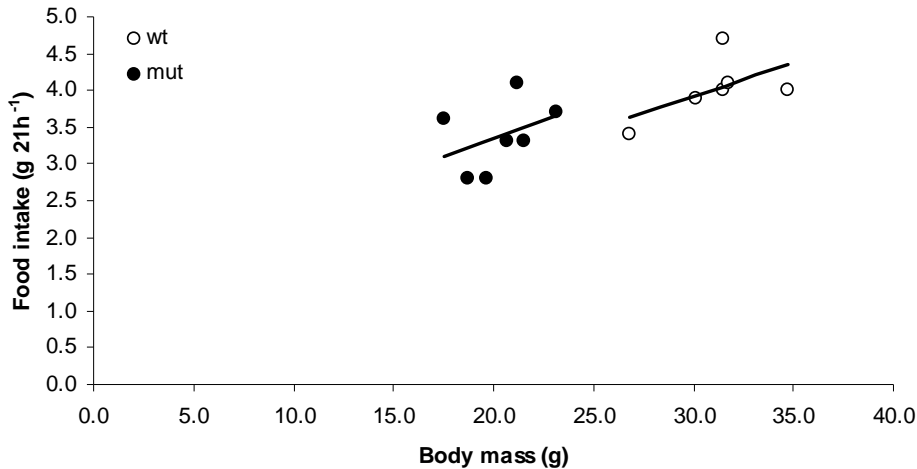

# RER: substrate utilization

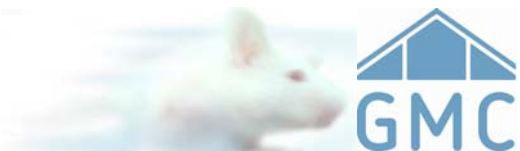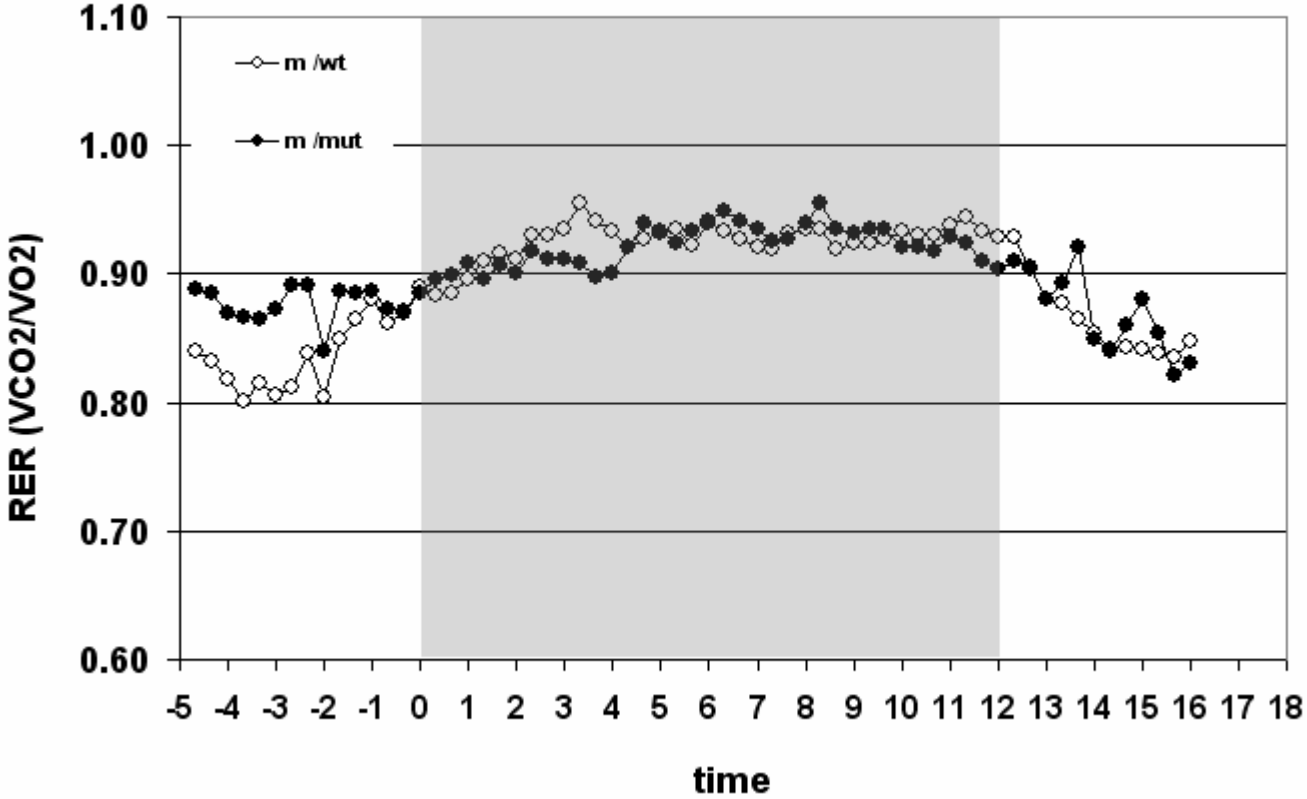

# Locomotor activity and rearing

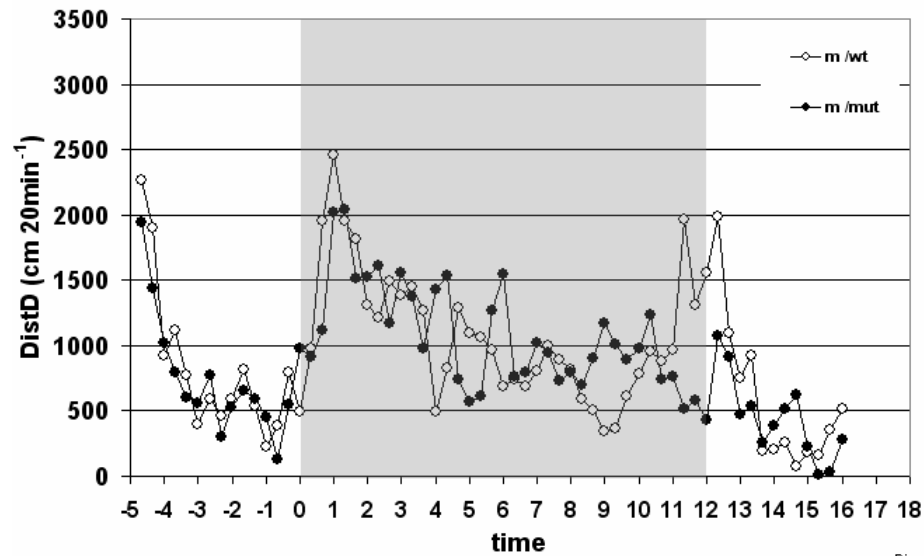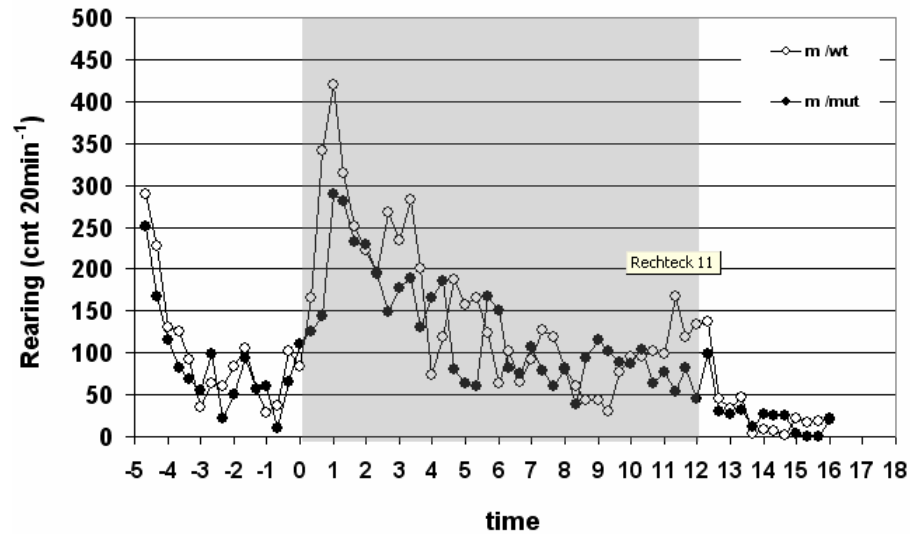



# Summary



The reduction in body mass between control and mutant mice was confirmed.

Rectal body temperature determined after the indirect calorimetry trial did not differ.

Both in control and mutant mice we observed the typical daily pattern in oxygen consumption during the IC trial. Mean oxygen consumption over 21 hours was correlated with body mass. Absolute  $VO_2$  was lower in mutants, however, adjusting for the body mass difference showed that  $VO_2$  was more or less as expected for reduced body mass. Using this approach no genotype effect on oxygen consumption could be detected.

There was also no clear genotype effect on food intake that seemed to be slightly increased in mutant mice.

Apart from minor differences observed during the first hours of the trial, RER was exactly the same in control and mutant mice. There was no indication for a shift in substrate utilization.

No effects could be detected in distance travelled and rearing behaviour.

It could be interesting to feed the mice a high fat diet and monitor energy balance as well as shifts in substrate utilization. Further details need to be discussed.
