# Supplementary material for: The negative adipogenesis regulator Dlk1 is transcriptionally regulated by Ifrd1 (TIS7) and translationally by its orthologue Ifrd2 (SKMc15)
Source: eLife. 2023 Aug 21;12:e88350. doi: 10.7554/eLife.88350 (PMC10468205; doi:10.7554/eLife.88350)
Supplement: Figure 1—source data 1. [file elife-88350-fig1-data1.xls]

## Sheet: ReadMe
CAVE!	WT103 war im µCT NICHT auswertbar
Dichtewerte umgerechnet mit
	HU=1000* (Dichte/Wasserdichte -1)

## Sheet: Signifikanzen_26_red
	Weight3_mct_MW									Fatmass_g_MW									Fatmass%_MW
Genotype	Weight3_mct_MW	Anzahl	Min	Max	STABW	Std. Error	delta_Weight	Sign.ANOVA	Sign.T-Test	Fatmass_g_MW	Anzahl	Min	Max	STABW	Std. Error	delta_Fatmass_g	Sign.ANOVA	Sign..T-Test	Fatmass%_MW	Anzahl	Min	Max	STABW	Std. Error	delta_Fatmass%	Sign.ANOVA	Sign..T-Test
TIS7_KO	36.1286	7	31.7	42.1	4.03514	1.52514	-0.0509132	n.s.	n.s.	1.26041	7	0.460624	1.90899	0.639252	0.241615	-0.334362	n.s.	n.s.	0.0337085	7	0.0142608	0.0483288	0.0148965	0.00563034	-0.317179	n.s.	n.s.
SKMc15_KO	31.2857	7	26.9	37.8	4.18865	1.58316	-0.178134	**	**	0.313139	7	0.241745	0.534182	0.110105	0.0416158	-0.834627	***	***	0.0102119	7	0.00662316	0.0172874	0.00389349	0.0014716	-0.793142	***	***
DKO	20.9667	6	18.3	23.4	2.09539	0.85544	-0.449212	***	***	0.237688	6	0.164984	0.353212	0.0701492	0.0286383	-0.874474	***	***	0.0113397	6	0.00777786	0.0161284	0.00316714	0.00129298	-0.770297	***	***
WT	38.0667	6	36.2	39.9	1.4922	0.609189	0			1.89353	6	0.937603	2.71663	0.594083	0.242533	0			0.0493665	6	0.0259006	0.0680861	0.0140888	0.00575171	0
TIS7_KO							0									0									0
SKMc15_KO							-0.134045	n.s.	*							-0.751558	**	**							-0.697054	**	**
DKO							-0.419665	***	***							-0.81142	*	**							-0.663597	*	**
WT							0.0536444									0.502318									0.464512
TIS7_KO							0.154795									3.02508									2.30091
SKMc15_KO							0									0									0
DKO							-0.329833	***	***							-0.240949	n.s.	n.s.							0.110438	n.s.	n.s.
WT							0.216743									5.04695									3.83423
TIS7_KO							0.723143									4.30278									1.97262
SKMc15_KO							0.492164									0.317435									-0.0994548
DKO							0									0									0
WT							0.81558									6.96646									3.35344

## Sheet: TotalFat_5-8_SPSS-26
SampName	Group1	Group2	Weight3_mct	Dim_z	mct_TotalFatVol	FatVol_Weight	FatVol_Dim_z	Fatmass_g	Fatmass_percent
TIS7_SKO_B6-31-m_FAT	5	3	42.1	460	1978.56	46.9967	4.30122	1.87963	0.0446469
TIS7_SKO_B6-39-m_FAT	5	3	38.9	448	1680.18	43.1922	3.75039	1.59617	0.0410326
TIS7_SKO_B6-98-m_FAT	5	3	33.4	435	913.461	27.3491	2.09991	0.867788	0.0259817
TIS7_SKO_B6-99-m_FAT	5	3	31.7	419	507.169	15.999	1.21043	0.48181	0.0151991
TIS7_SKO_B1-11-m_FAT	5	3	39.5	427	2009.46	50.8724	4.706	1.90899	0.0483288
TIS7_SKO_BZ25-95-m_FAT	5	3	32.3	436	484.868	15.0114	1.11208	0.460624	0.0142608
TIS7_SKO_B17-17-m_FAT	5	3	35	415	1713.52	48.9577	4.12896	1.62784	0.0465098
TIS7_SKMKO_S44-46-m_FAT	6	2	30.9	422	562.297	18.1973	1.33246	0.534182	0.0172874
TIS7_SKMKO_S47-95-m_FAT	6	2	29	417	257.281	8.87174	0.61698	0.244416	0.00842815
TIS7_SKMKO_S48-97-m_FAT	6	2	29.2	419	277.493	9.50318	0.662274	0.263618	0.00902802
TIS7_SKMKO_S55-96-m_FAT	6	2	26.9	402	277.908	10.3311	0.691313	0.264012	0.00981458
TIS7_SKMKO_S38-31-m_FAT	6	2	37.8	447	268.191	7.09501	0.599981	0.254782	0.00674026
TIS7_SKMKO_S38-33-m_FAT	6	2	36.5	464	254.469	6.97174	0.548424	0.241745	0.00662316
TIS7_SKMKO_S52-72-m_FAT	6	2	28.7	381	409.701	14.2753	1.07533	0.389216	0.0135615
TIS7_DKO_K20-61-m_FAT	7	1	18.3	369	173.667	9.49003	0.470644	0.164984	0.00901553
TIS7_DKO_K32-96-m_FAT	7	1	23.4	386	267.14	11.4163	0.692074	0.253783	0.0108454
TIS7_DKO_K2-59-m_FAT	7	1	22.3	376	239.033	10.719	0.635725	0.227081	0.010183
TIS7_DKO_K23-73-m_FAT	7	1	18.5	367	274.34	14.8292	0.747522	0.260623	0.0140878
TIS7_DKO_K28-78-m_FAT	7	1	21.9	391	371.802	16.9772	0.950899	0.353212	0.0161284
TIS7_DKO_K61-70-m_FAT	7	1	21.4	348	175.207	8.18722	0.503467	0.166446	0.00777786
TIS7_WT_K24-37-m_FAT	8	4	39.9	447	2859.61	71.6695	6.39735	2.71663	0.0680861
TIS7_WT_K46-57-m_FAT	8	4	37	437	1796.55	48.5555	4.11111	1.70673	0.0461277
TIS7_WT_K36-60-m_FAT	8	4	38.9	461	1899.06	48.819	4.11944	1.80411	0.0463781
TIS7_WT_K36-88-m_FAT	8	4	39.3	457	2369.53	60.2935	5.18497	2.25106	0.0572788
TIS7_WT_K46-66-m_FAT	8	4	37.1	440	2047.45	55.1873	4.65329	1.94508	0.0524279
TIS7_WT_BZ17-68-m_FAT	8	4	36.2	445	986.95	27.2638	2.21787	0.937603	0.0259006
