# Supplementary figures and images for: The negative adipogenesis regulator Dlk1 is transcriptionally regulated by Ifrd1 (TIS7) and translationally by its orthologue Ifrd2 (SKMc15)
Source: eLife journal article supplement (doi:10.7554/elife.88350), 2023-08-21

I

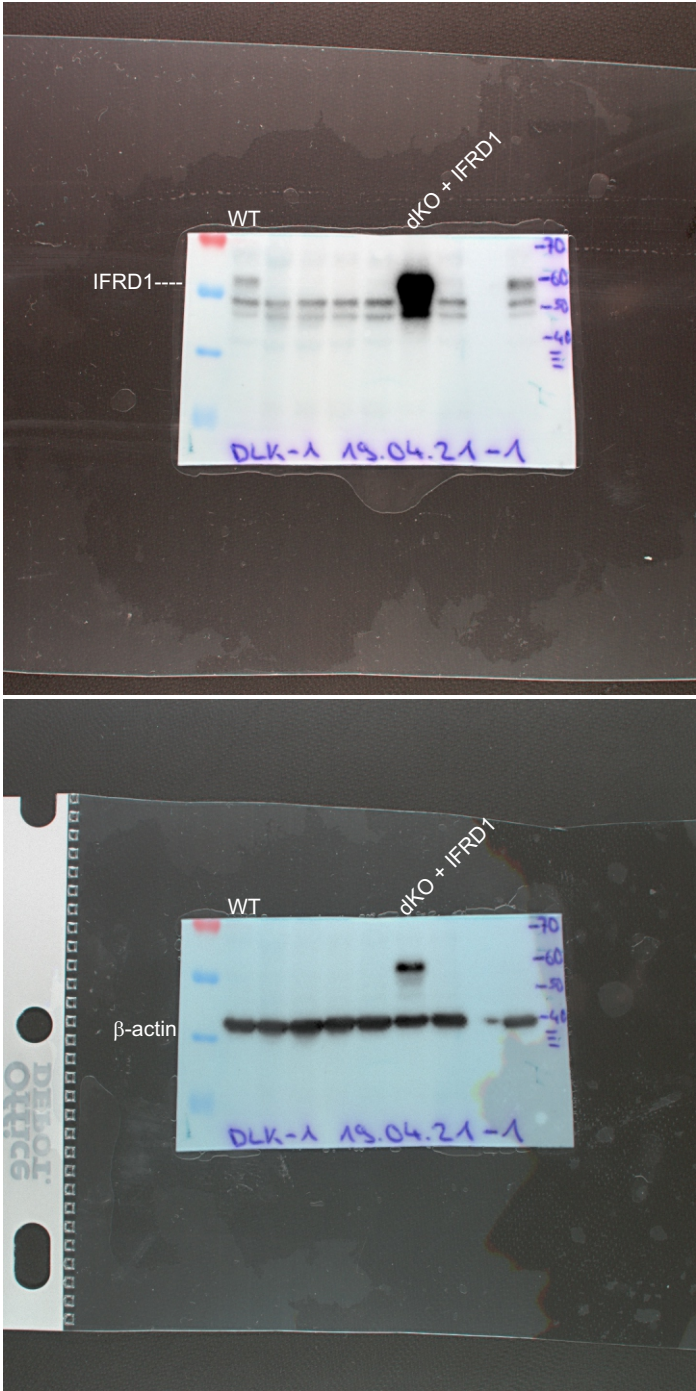

J

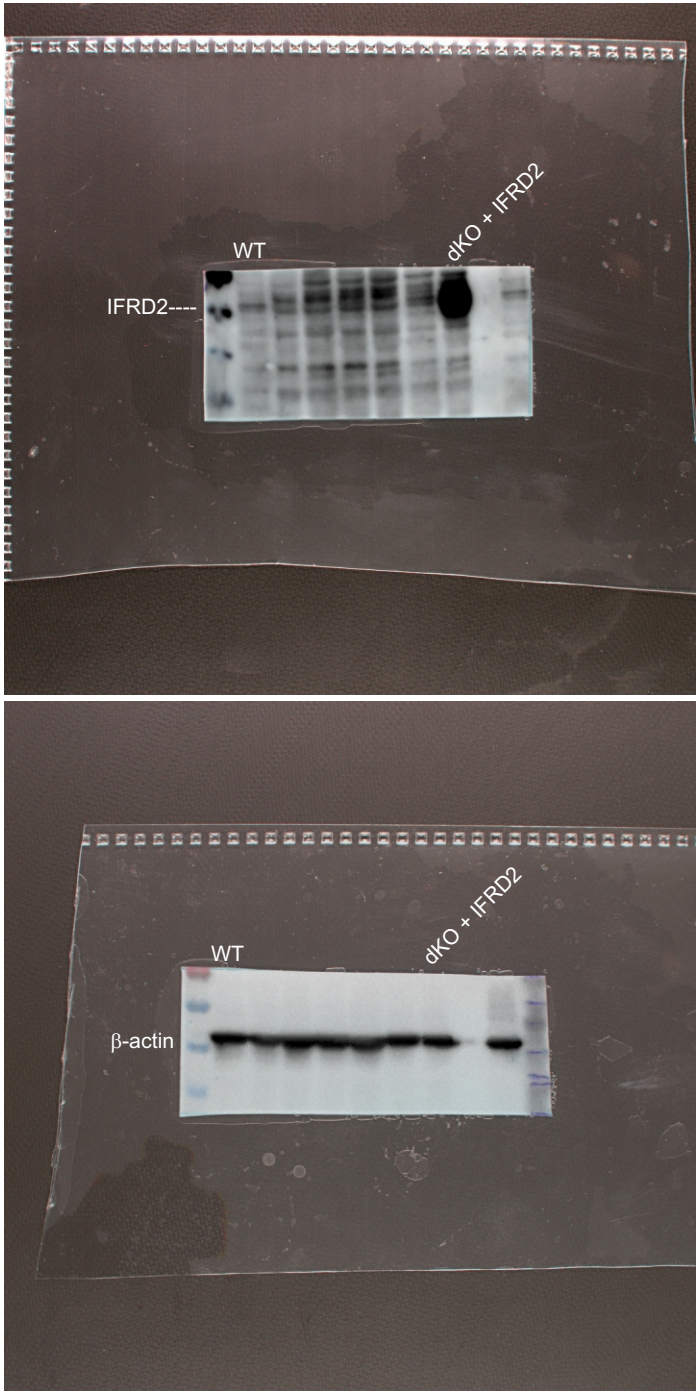

Supplement: fig1-figsupp2-data1 [file elife-88350-fig1-figsupp2-data1-v2.zip]

D

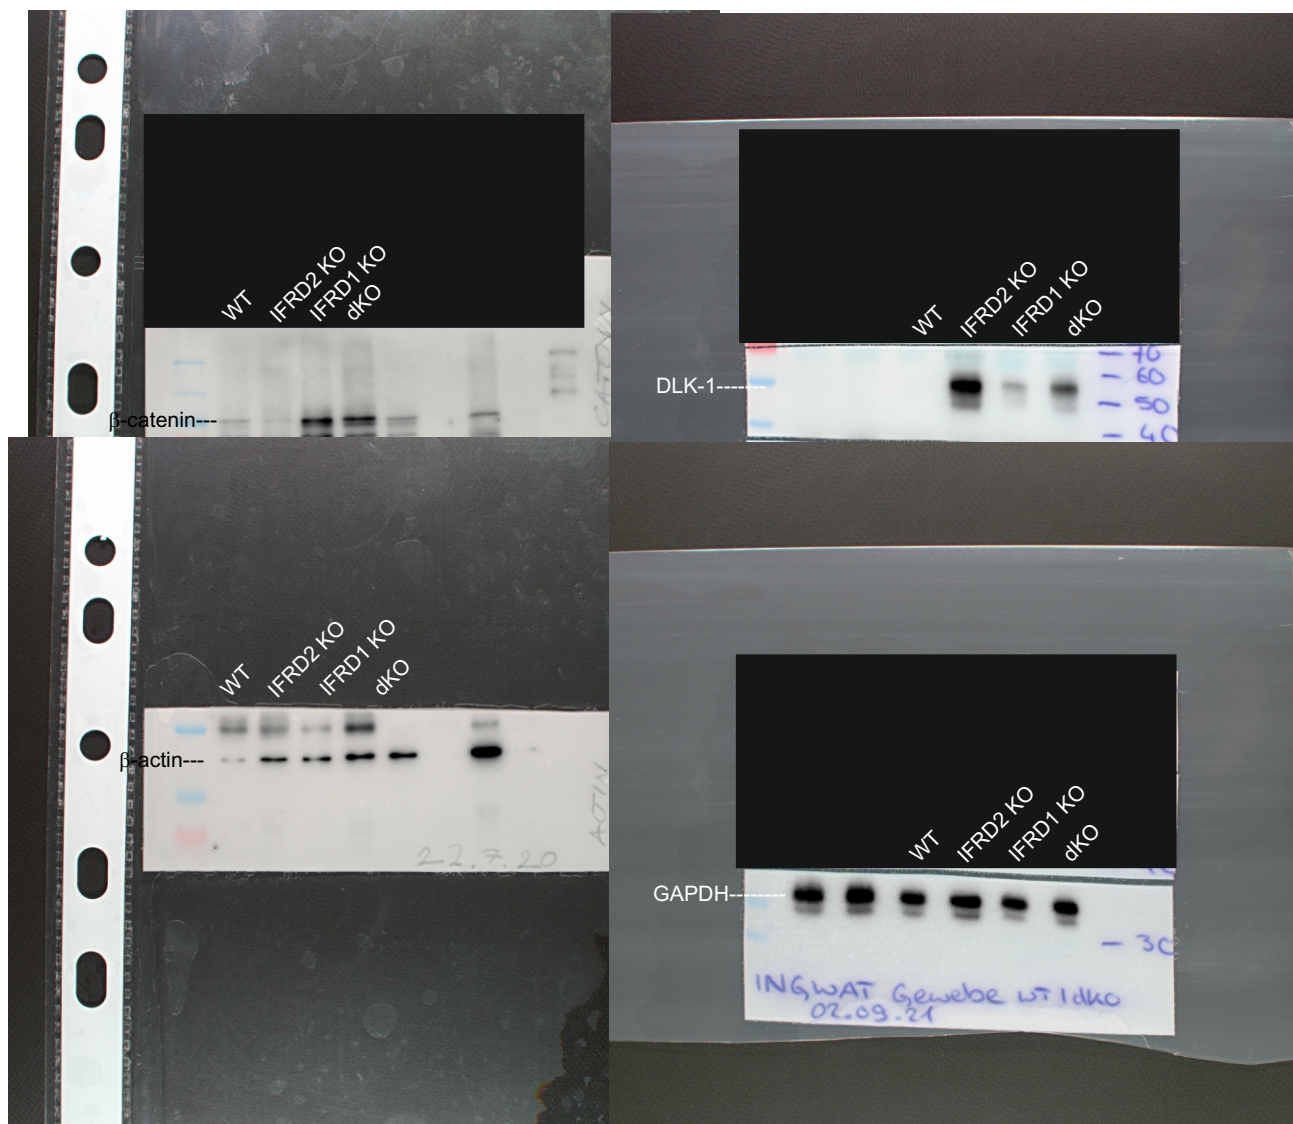

Supplement: fig2-data1 [file elife-88350-fig2-data1-v2.zip]

E

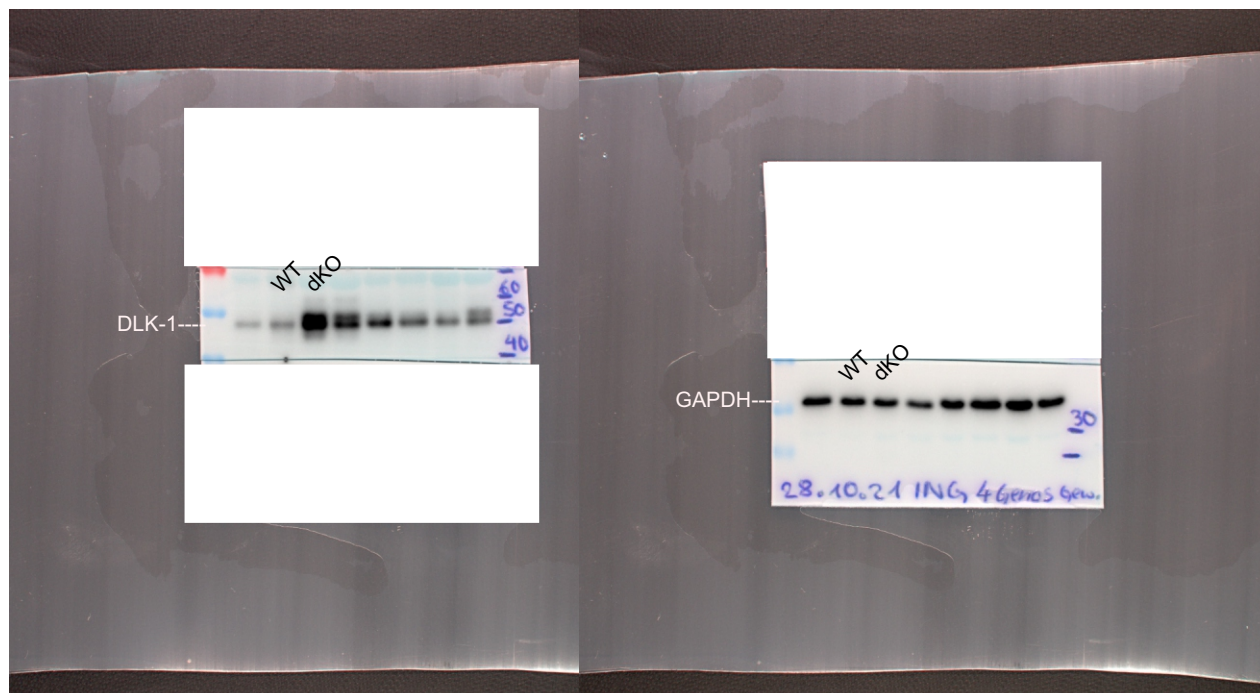

Supplement: fig2-data2 [file elife-88350-fig2-data2-v2.zip]

G

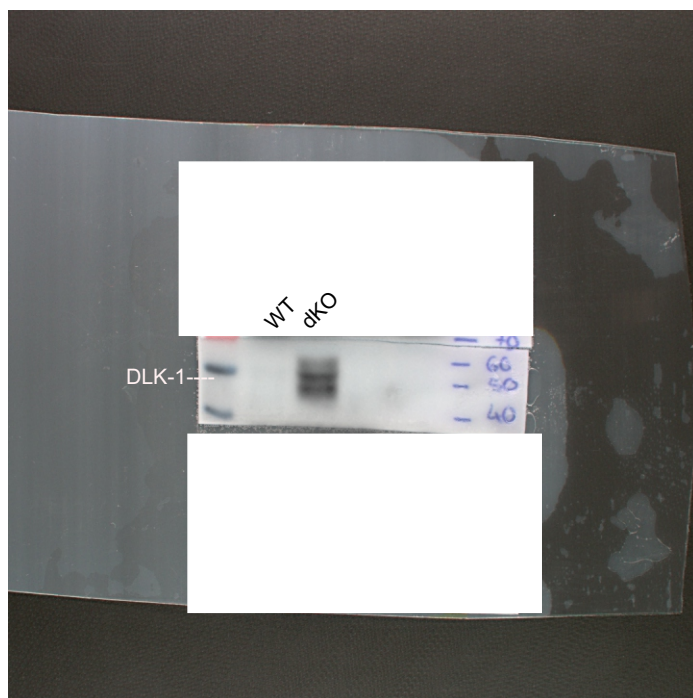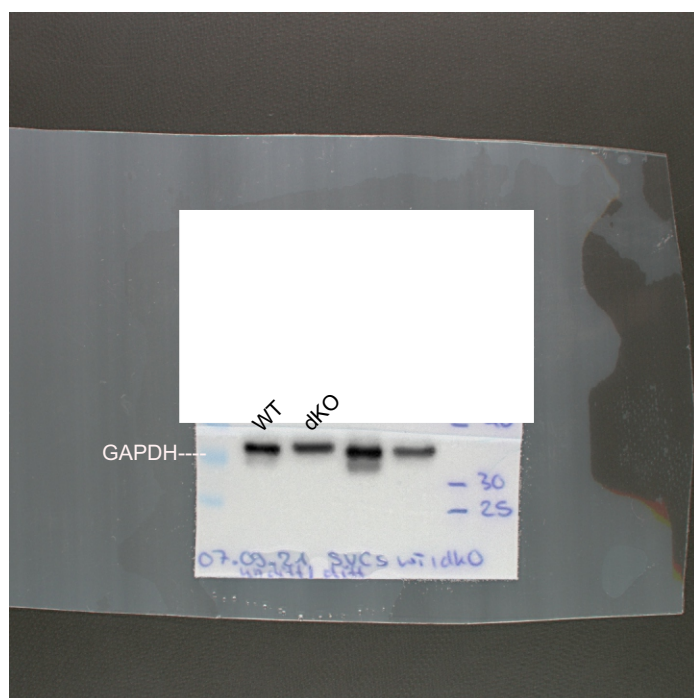

Supplement: fig2-data3 [file elife-88350-fig2-data3-v3.zip]

B

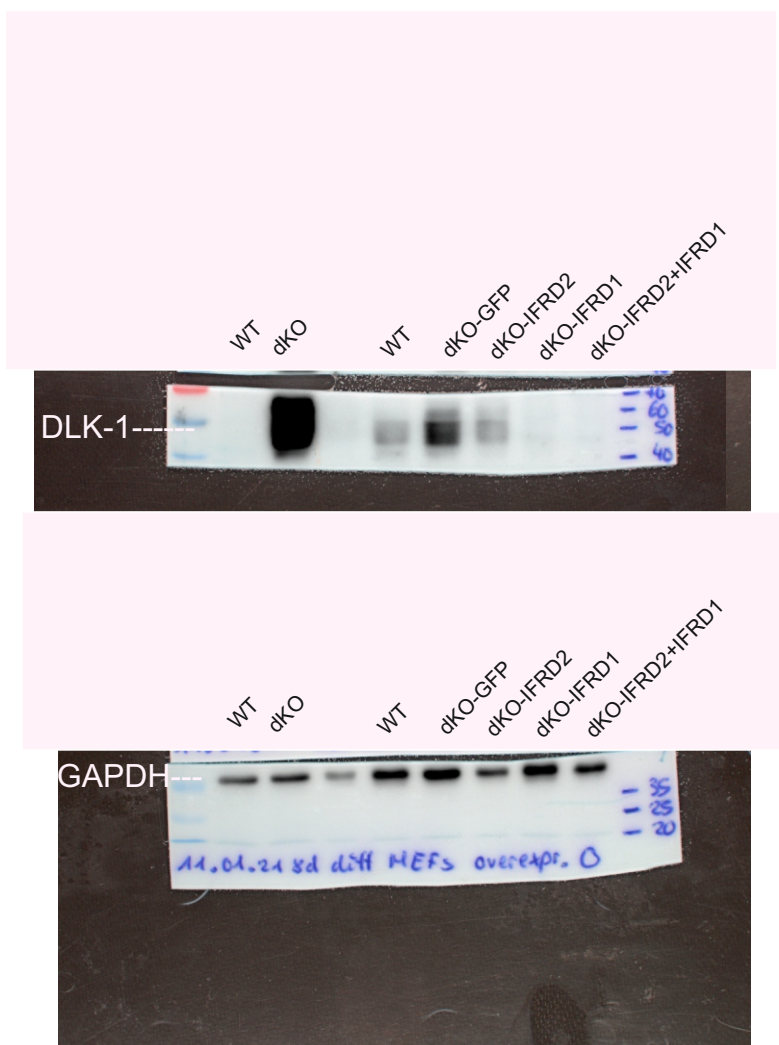

Supplement: fig3-data1 [file elife-88350-fig3-data1-v3.zip]

Figure 3 - figure supplement 1

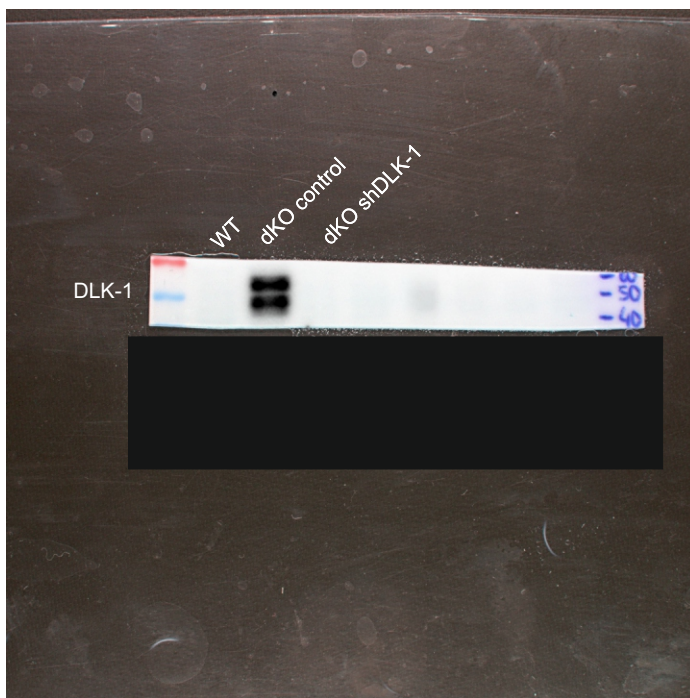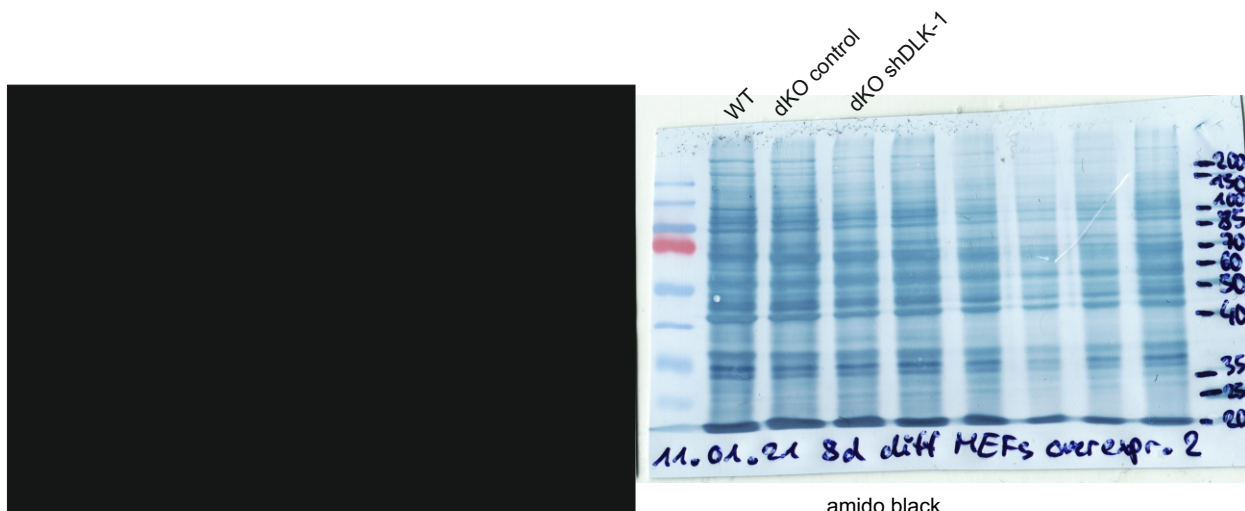

amido black

Supplement: fig3-figsupp1-data1 [file elife-88350-fig3-figsupp1-data1-v2.zip]

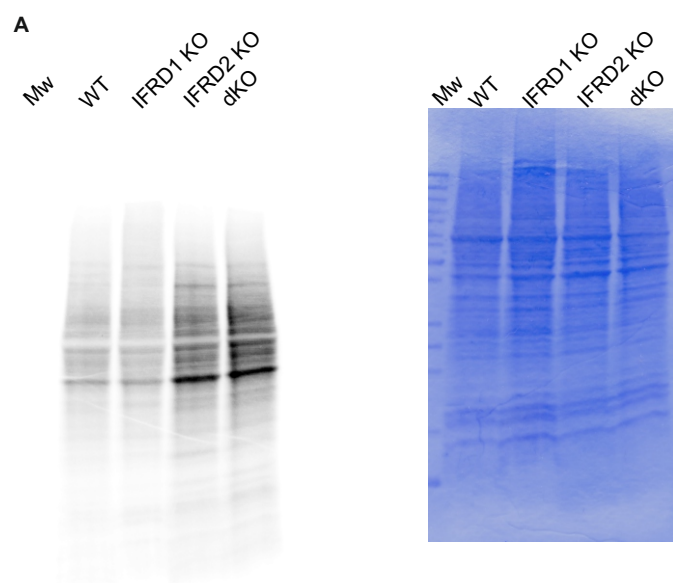

Supplement: fig4-data1 [file elife-88350-fig4-data1-v3.zip]

B

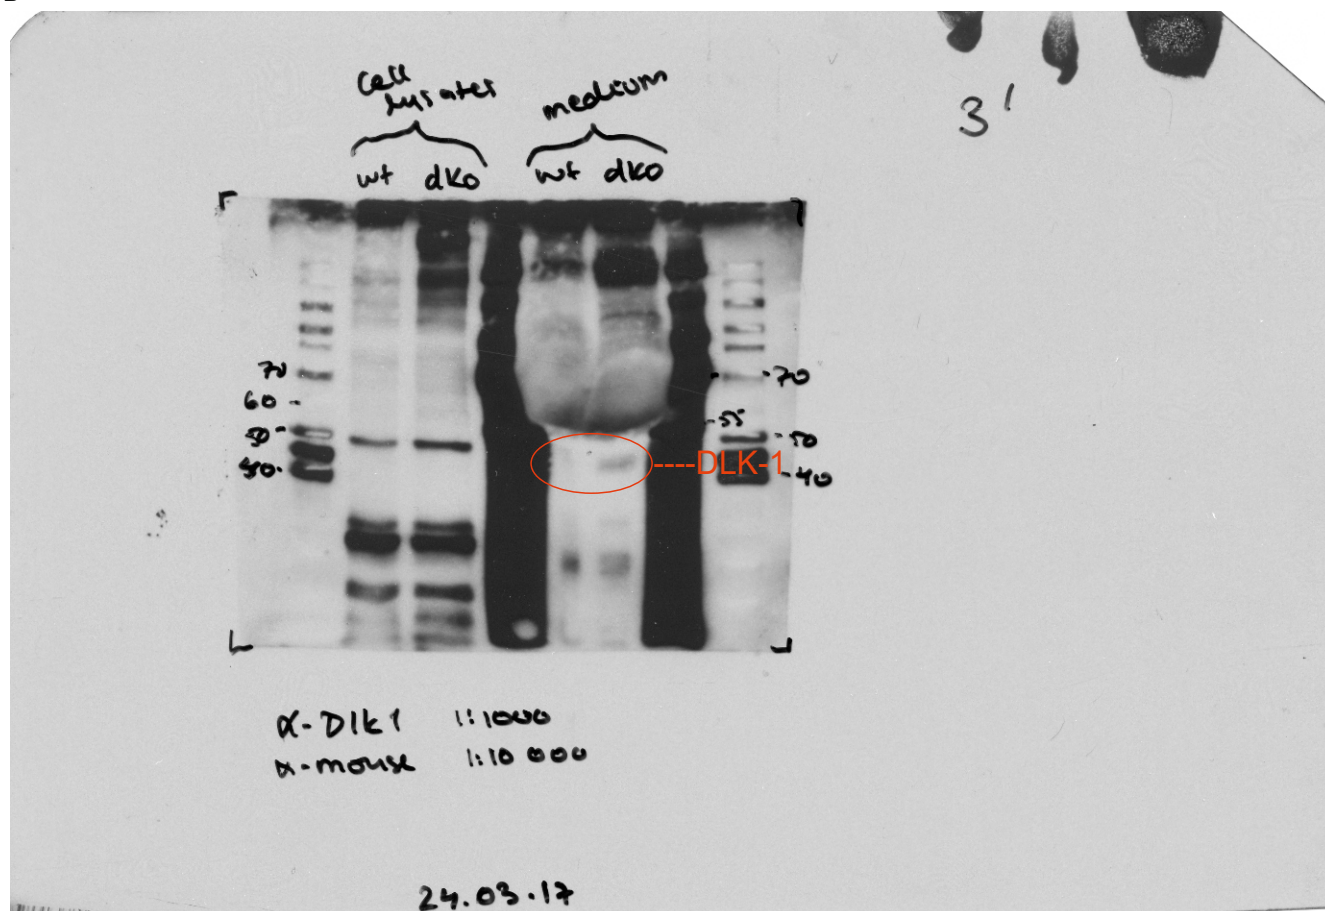

DLK-1 WB

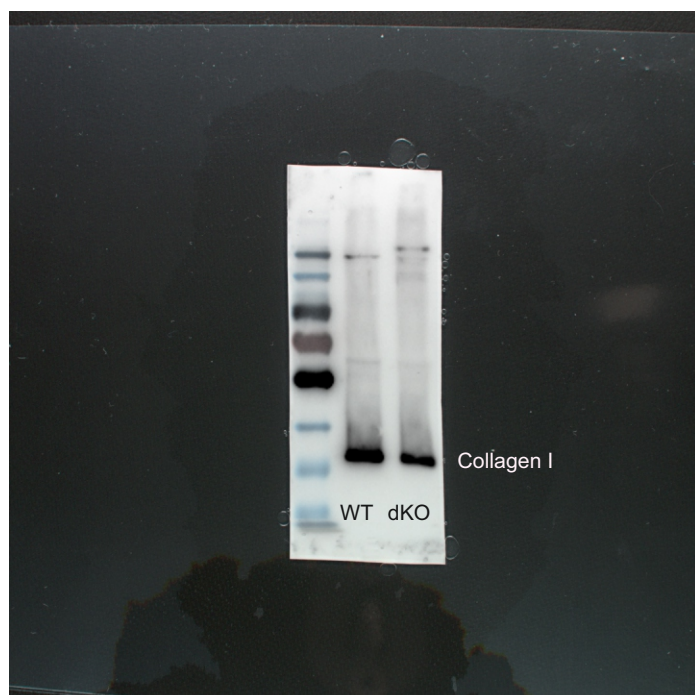

Supplement: fig4-data2 [file elife-88350-fig4-data2-v2.zip]

G

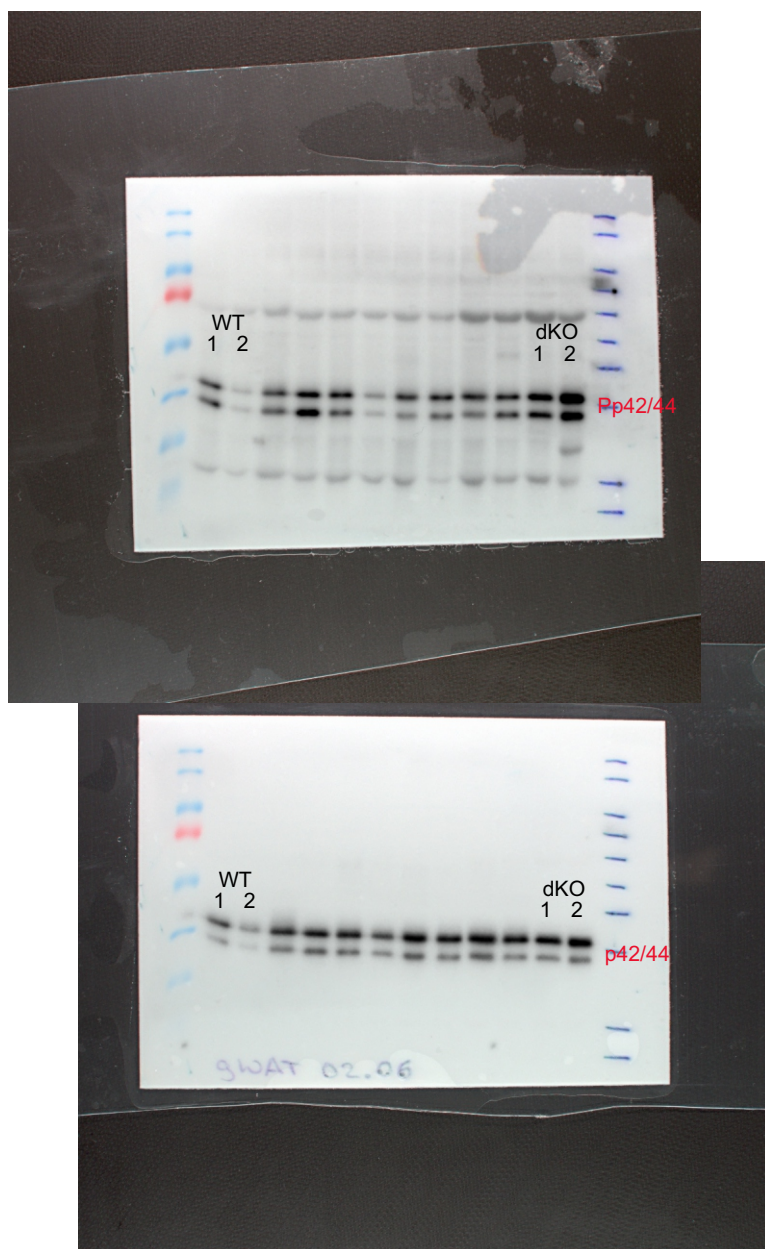

Supplement: fig4-data3 [file manuscript Fig 4G.pdf › Figure 4G - source data/manuscript Fig 4G.pdf]

G

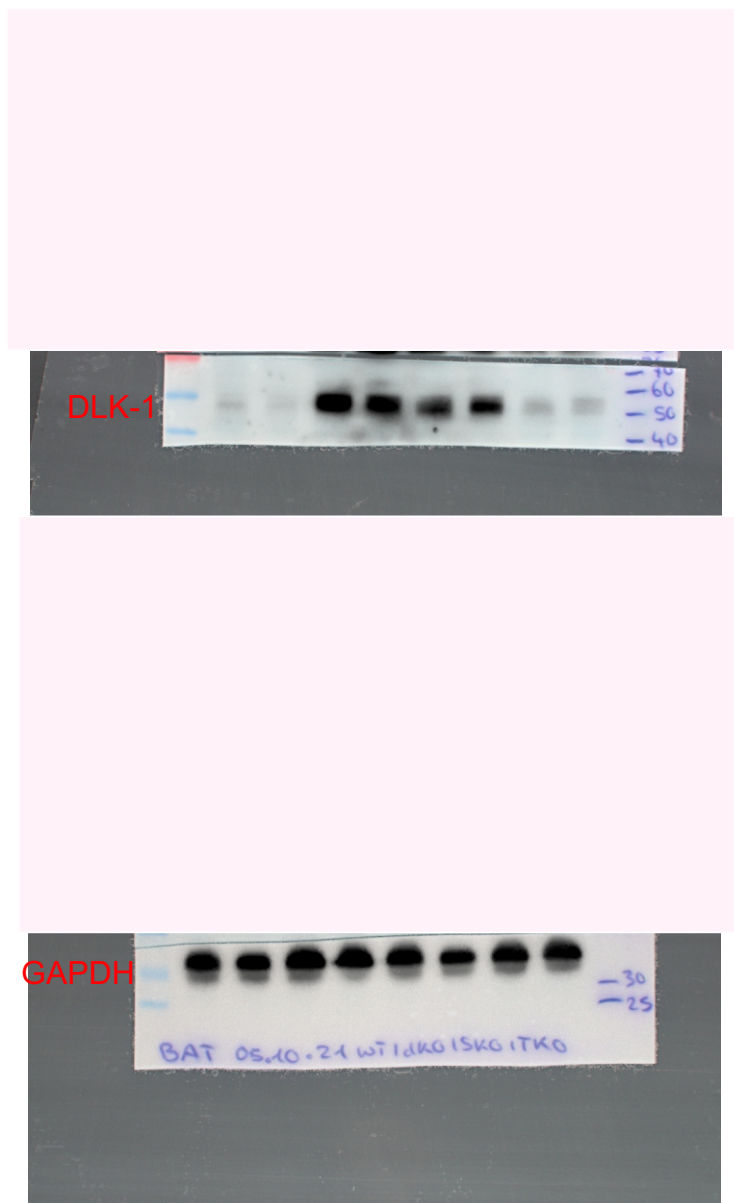

Supplement: fig4-data4 [file elife-88350-fig4-data4-v3.zip]

Figure 4 - figure supplement 1 and 2

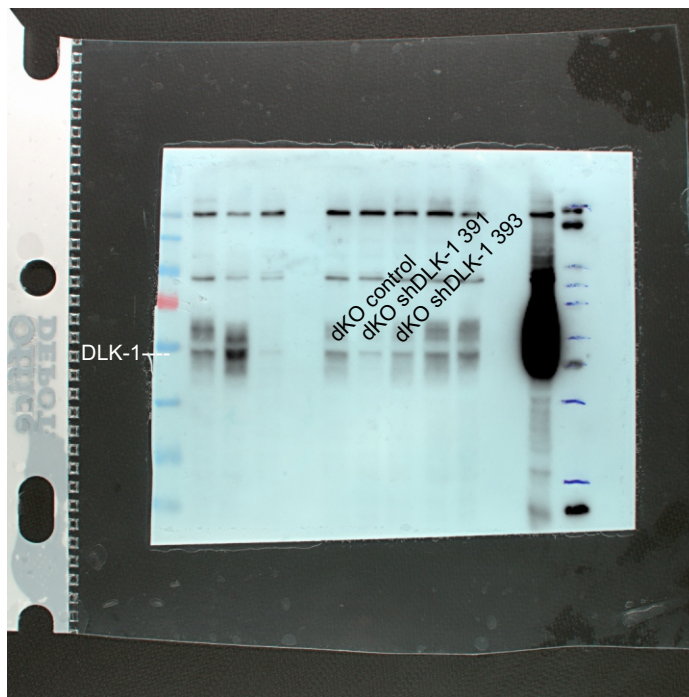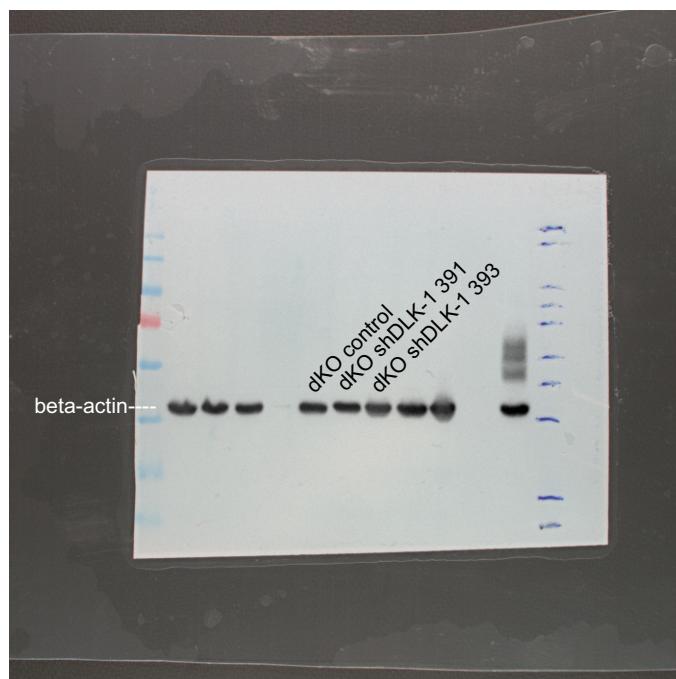

Supplement: fig4-figsupp1-data1 [file elife-88350-fig4-figsupp1-data1-v2.zip]
